# Supplementary material for: Association between the cumulative average triglyceride glucose-body mass index and cardiovascular disease incidence among the middle-aged and older population: a prospective nationwide cohort study in China
Source: PubMed Central journal article supplement (PMC10771655; doi:10.1186/s12933-023-02114-w), 2024-01-06

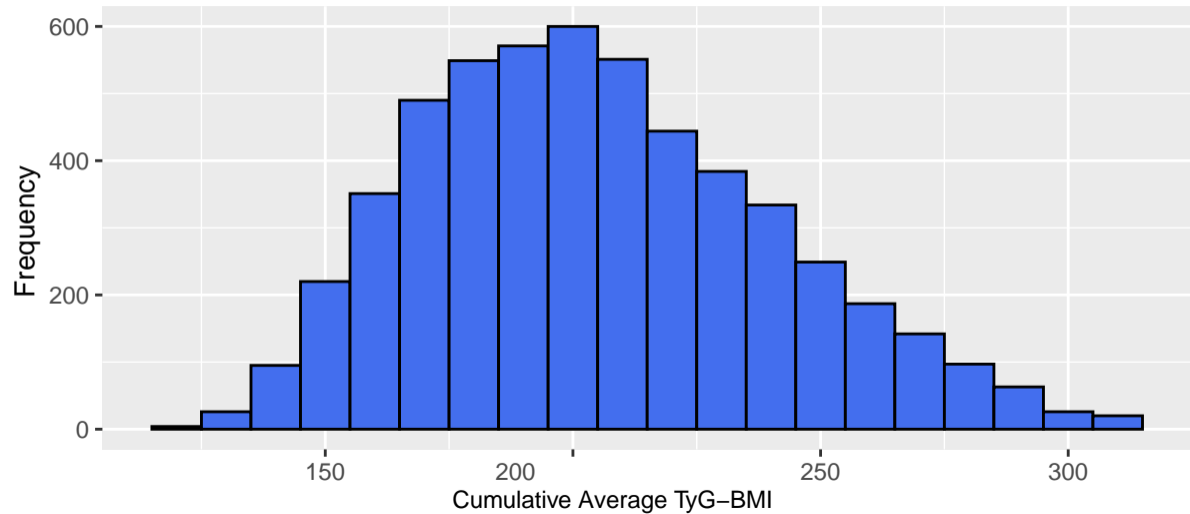

Supplement: 12933_2023_2114_MOESM2_ESM.pdf [file 12933_2023_2114_MOESM2_ESM.pdf]
